# Supplementary material
Source: PubMed Central journal article supplement (PMC3458397)
Supplement: 1203831109_pnas.1203831109_SI.pdf [file 1203831109_pnas.1203831109_SI.pdf]

# Supporting Information

Rodrigo et al. 10.1073/pnas.1203831109

**Other Supporting Information Files**

[Dataset S1 \(XLS\)](#)
